# Supplementary material for: Isolation of Thermophilic Bacteria from Extreme Environments in Northern Chile
Source: MDPI journal article supplement (doi:10.3390/microorganisms12030473), 2024-02-27
Supplement: s1 [file s1]

**Supplementary Figures**

CJ1

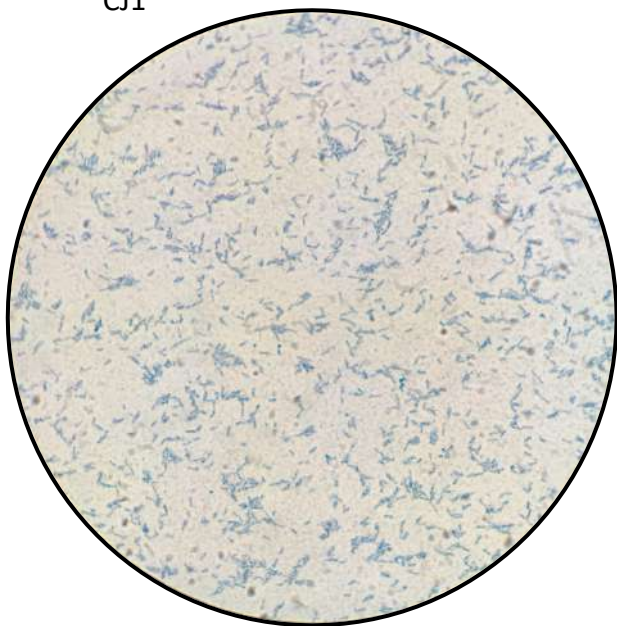

CJ5

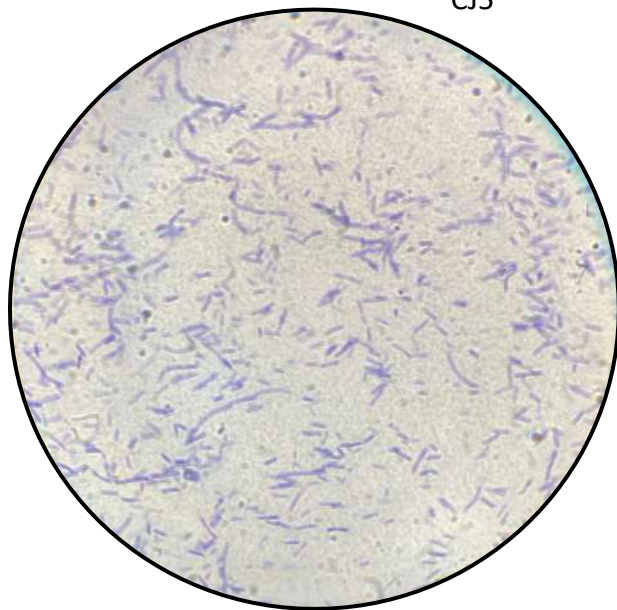

CT1

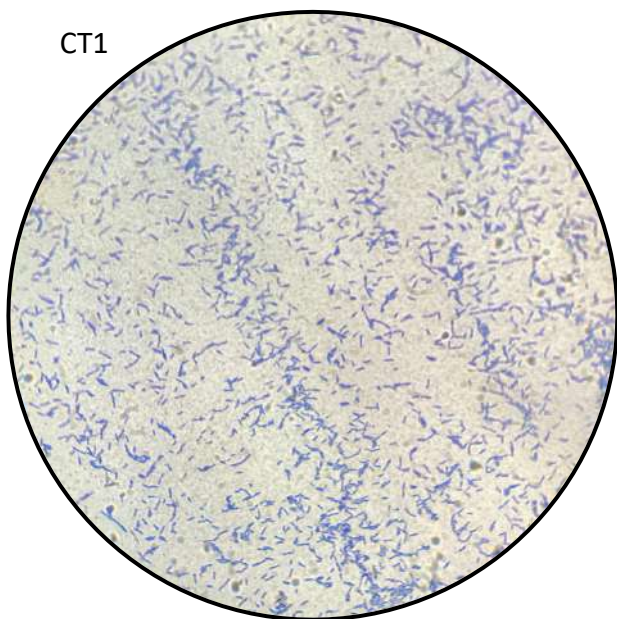

702B

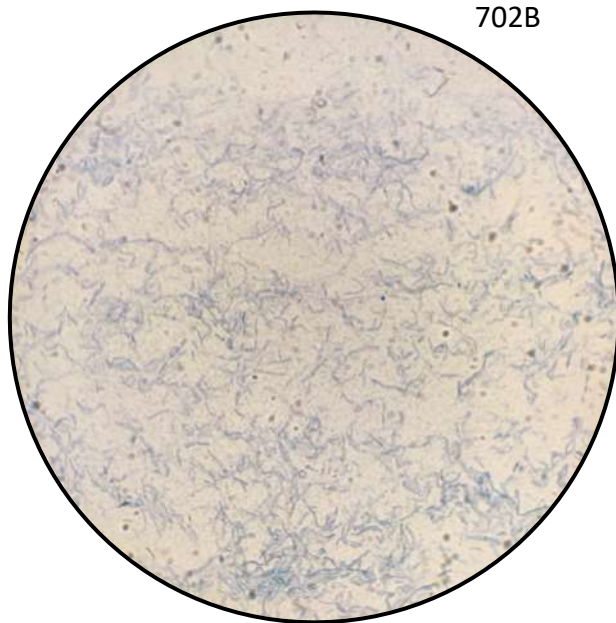

2A55

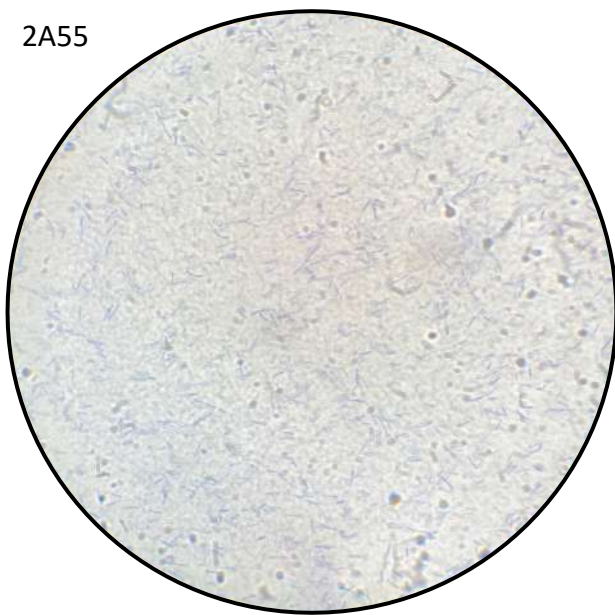

2B55

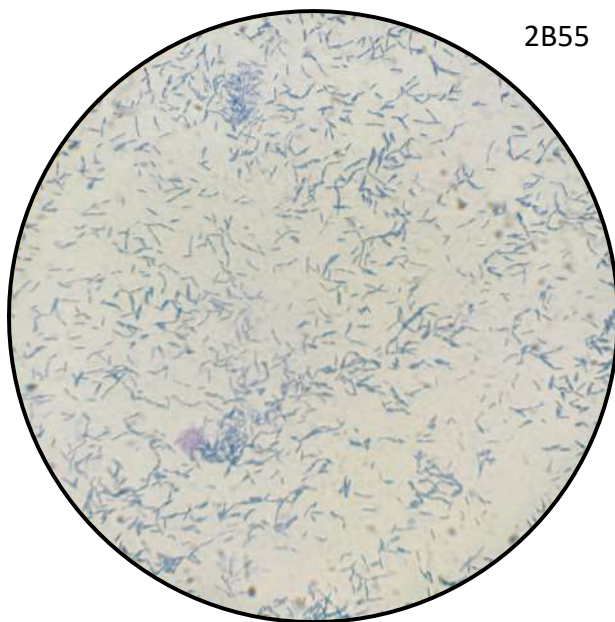

SA

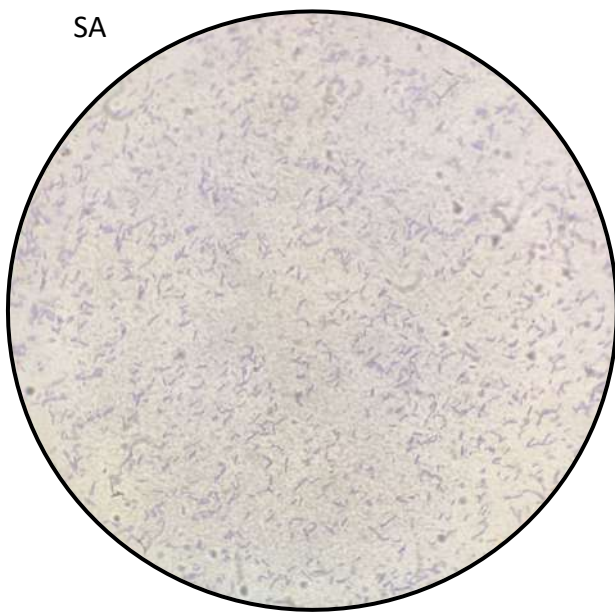

2\*55

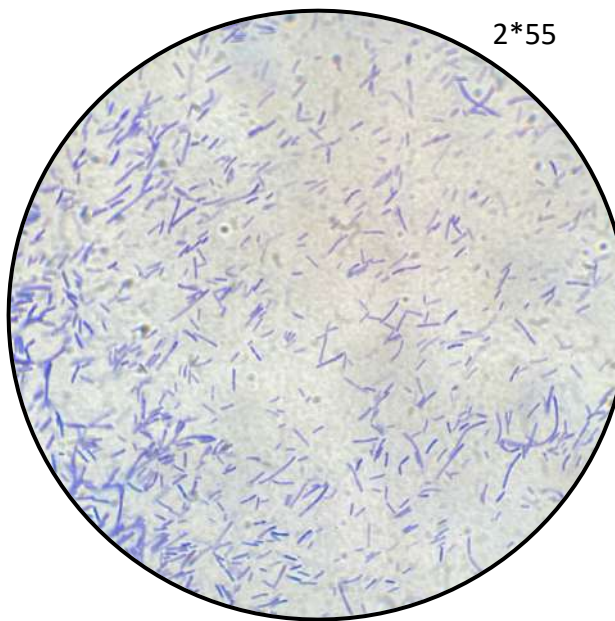



M8

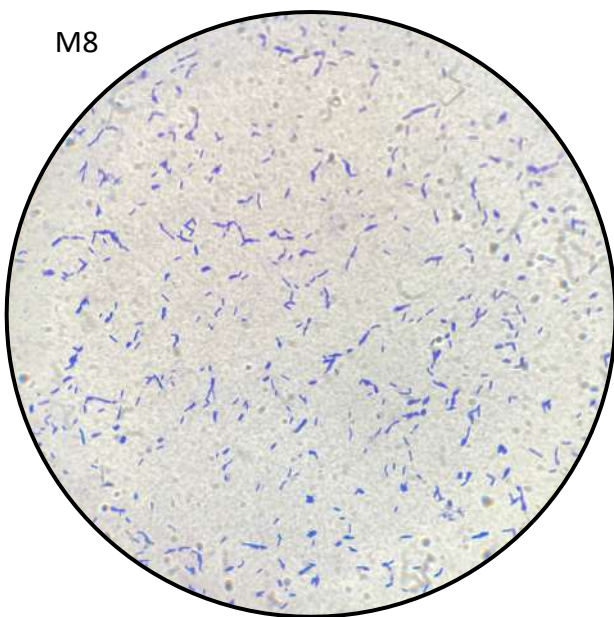

3A55

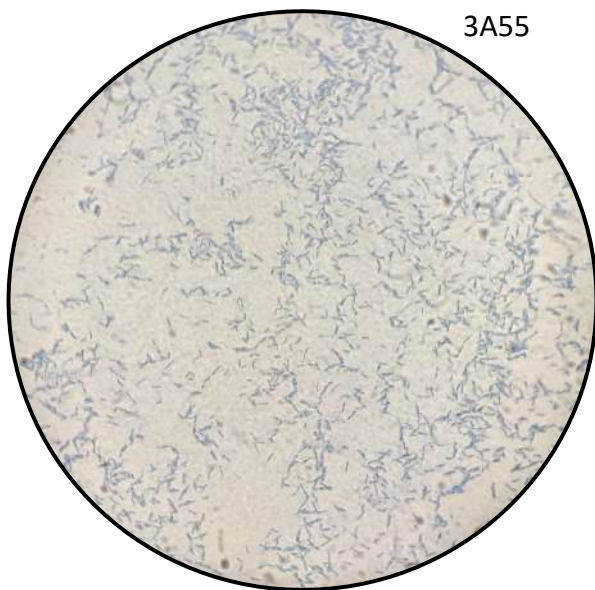

TB4

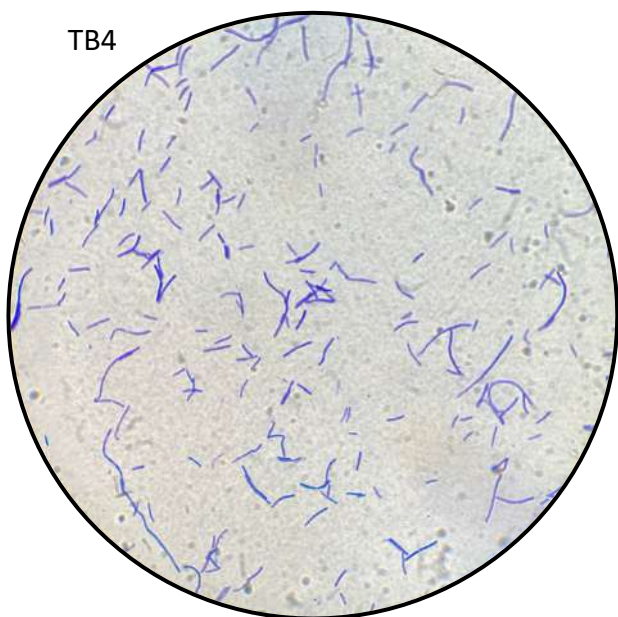

TB5

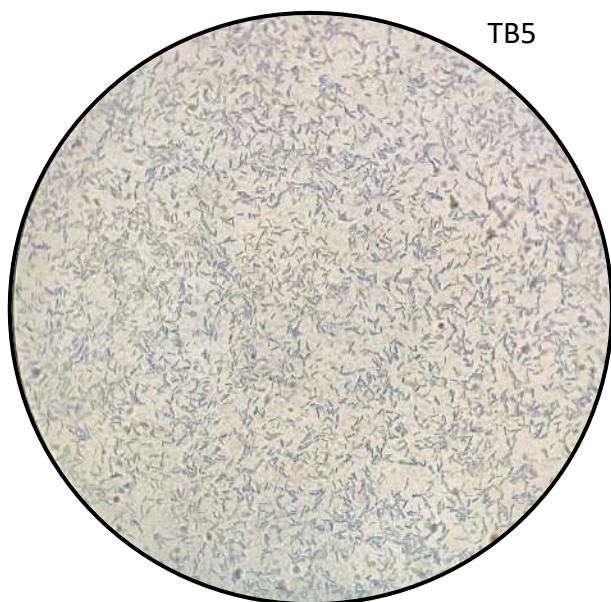

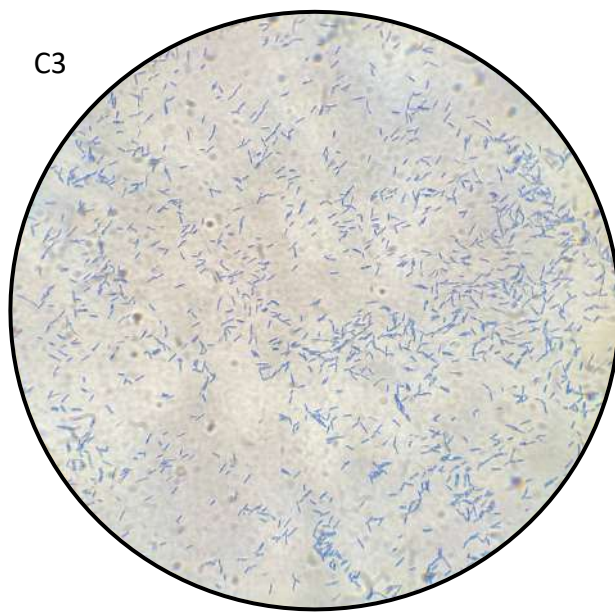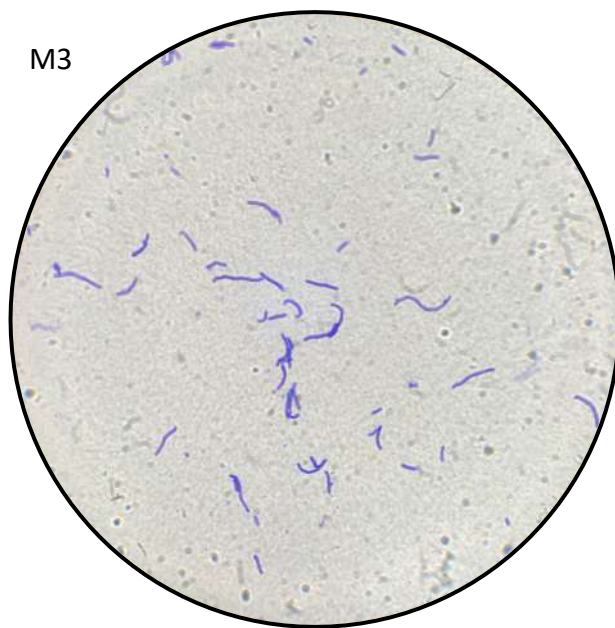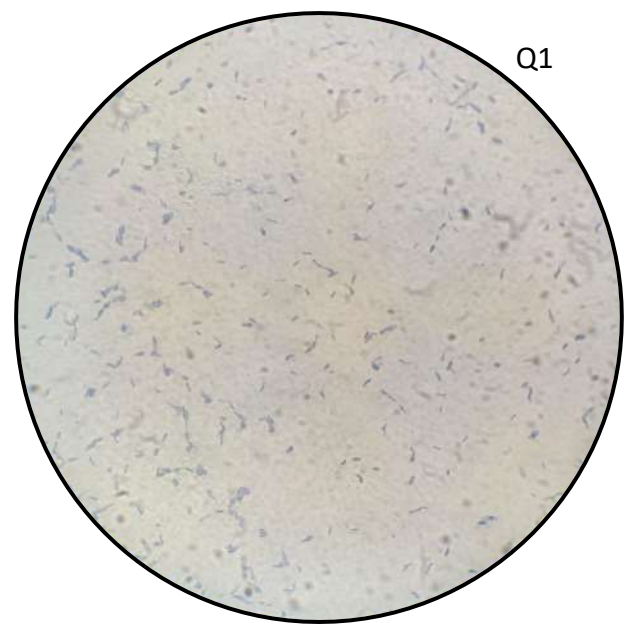

**Fig 1S. Gram staining (1,000X) of the isolated strains:** CJ1 y CJ5 (*Termas Jurasí*); CT1,702b, 2A55, 2B55, SA, 2\*55, M8 and 3A55 (*El Tatío* Geothermal Field); TB4 and TB5 (*Laguna Tebenquiche*); C3 (*Laguna Cejar*); M3 and Q1 (*Quebrada Carrizo*).
